# Supplementary material for: Systematic identification and integrative analysis of novel genes expressed specifically or predominantly in mouse epididymis
Source: Springer Nature journal article supplement (doi:10.1186/1471-2164-7-314), 2006-12-01
Supplement: Additional file 1 [file 1471-2164-7-314-s1.pdf]

## Additional data file 1

### List of known genes

| UniGene ID                          | Gene description                                                             |
|-------------------------------------|------------------------------------------------------------------------------|
| <b>Epididymis-specific genes</b>    |                                                                              |
| Mm.281961                           | defensin beta 12                                                             |
| Mm.99528                            | Rnase 9                                                                      |
| Mm.99441                            | epididymal protein (Av381130)                                                |
| Mm.160060                           | Spint4                                                                       |
| Mm.1286                             | seminal vesicle protein 2                                                    |
| Mm.229357                           | defensin beta 6                                                              |
| Mm.99395                            | seminal vesicle protein, secretion 2                                         |
| Mm.3787                             | seminal vesicle secretion 6                                                  |
| Mm.260341                           | seminal vesicle secretion 3                                                  |
| Mm.117462                           | G protein-coupled receptor 82                                                |
| <b>Epididymis-predominant genes</b> |                                                                              |
| Mm.16781                            | cysteine-rich secretory protein 1                                            |
| Mm.1332                             | glutathione peroxidase 5                                                     |
| Mm.99511                            | epididymal protein Av381126                                                  |
| Mm.318775                           | Rnase 10                                                                     |
| Mm.12867                            | Lipocalin 5                                                                  |
| Mm.99424                            | cystatin 11                                                                  |
| Mm.42209                            | tectorin alpha                                                               |
| Mm.117450                           | a disintegrin and metalloprotease domain 28                                  |
| Mm.261495                           | a disintegrin and metalloprotease domain 7                                   |
| Mm.183909                           | a disintegrin and metalloprotease domain 28                                  |
| Mm.99556                            | cyclic nucleotide gated channel alpha 4                                      |
| Mm.57030                            | phenylethanolamine-N-methyltransferase                                       |
| <b>Ubiquitous genes</b>             |                                                                              |
| Mm.306720                           | complement component 4 binding protein                                       |
| Mm.4266                             | integral membrane protein 2B                                                 |
| Mm.279485                           | ribonuclease/angiogenin inhibitor 1                                          |
| Mm.30300                            | CEA-related cell adhesion molecule 10                                        |
| Mm.302013                           | ras homolog gene family, member G                                            |
| Mm.27915                            | nucleoredoxin                                                                |
| Mm.271891                           | sorting nexin 1                                                              |
| Mm.221403                           | platelet derived growth factor receptor, alpha polypeptide                   |
| Mm.21936                            | RAB21, member RAS oncogene family                                            |
| Mm.14460                            | aldo-keto reductase family 1, member B7                                      |
| Mm.9086                             | solute carrier family 16 (monocarboxylic acid transporters), member 1        |
| Mm.9052                             | progesterone receptor membrane component 1                                   |
| Mm.87639                            | high mobility group box transcription factor 1                               |
| Mm.46705                            | serologically defined colon cancer antigen 1                                 |
| Mm.4172                             | stem-loop binding protein                                                    |
| Mm.38155                            | actin related protein 2/3 complex, subunit 5-like                            |
| Mm.34171                            | prominin 2                                                                   |
| Mm.300628                           | synaptogyrin 2                                                               |
| Mm.295898                           | Aldehyde dehydrogenase family 6, subfamily A1                                |
| Mm.29346                            | guanosine monophosphate reductase 2                                          |
| Mm.292547                           | prostaglandin-endoperoxide synthase 2                                        |
| Mm.291624                           | anaphase promoting complex subunit 2                                         |
| Mm.282053                           | ribosomal protein L7                                                         |
| Mm.280068                           | chromosome condensation 1-like                                               |
| Mm.274926                           | embigin                                                                      |
| Mm.25181                            | zinc finger, CCHC domain containing 11                                       |
| Mm.248827                           | calnexin                                                                     |
| Mm.248237                           | COX15 homolog, cytochrome c oxidase assembly protein (yeast)                 |
| Mm.24130                            | CD52 antigen                                                                 |
| Mm.215034                           | matrin 3                                                                     |
| Mm.210352                           | splicing factor, arginine/serine-rich 10 (transformer 2 homolog, Drosophila) |
| Mm.200608                           | Clusterin                                                                    |
| Mm.182377                           | UDP-Gal:betaGlcNAc beta 1,4-galactosyltransferase, polypeptide 4             |
| Mm.158251                           | plasma glutamate carboxypeptidase                                            |
| Mm.143689                           | acyl-CoA synthetase long-chain family member 4                               |
| Mm.127681                           | ataxia, cerebellar, Cayman type homolog (human)                              |
| Mm.99593                            | transcription termination factor, mitochondrial-like                         |

| UniGene ID                          | Gene description                                                                                |
|-------------------------------------|-------------------------------------------------------------------------------------------------|
| <b>Ubiquitous genes (continued)</b> |                                                                                                 |
| Mm.877                              | chemokine (C-X-C motif) ligand 10                                                               |
| Mm.86705                            | eukaryotic translation initiation factor 2C, 4                                                  |
| Mm.86343                            | TAF3 RNA polymerase II, TATA box binding protein (TBP)-associated factor                        |
| Mm.850                              | signal recognition particle 14                                                                  |
| Mm.84073                            | Bcl2-associated athanogene 3                                                                    |
| Mm.826                              | ras homolog gene family, member Q                                                               |
| Mm.74711                            | nuclear receptor interacting protein 1                                                          |
| Mm.7445                             | MAP/microtubule affinity-regulating kinase 1                                                    |
| Mm.6967                             | Bcl2-like 2                                                                                     |
| Mm.65306                            | ADAMTS-like 3                                                                                   |
| Mm.641                              | activating transcription factor 4                                                               |
| Mm.6118                             | sorting nexin 17                                                                                |
| Mm.582                              | fatty acid binding protein 4, adipocyte                                                         |
| Mm.5731                             | glutathione S-transferase, theta 3                                                              |
| Mm.56935                            | potassium voltage-gated channel, Shal-related family, member 1                                  |
| Mm.549                              | interferon gamma receptor                                                                       |
| Mm.5246                             | peptidylprolyl isomerase A                                                                      |
| Mm.5222                             | serine/arginine repetitive matrix 2                                                             |
| Mm.47384                            | C-type (calcium dependent, carbohydrate recognition domain) lectin, superfamily member 6        |
| Mm.46754                            | solute carrier family 38, member 2                                                              |
| Mm.4504                             | Gap junction membrane channel protein alpha 1 (Gja1)                                            |
| Mm.44876                            | tripartite motif protein 2                                                                      |
| Mm.444                              | inhibitor of DNA binding 1                                                                      |
| Mm.42202                            | thrombospondin type 1 domain containing gene                                                    |
| Mm.41757                            | gamma-glutamyltransferase-like 3                                                                |
| Mm.40036                            | proline-rich polypeptide 3                                                                      |
| Mm.3990                             | suppressor of K+ transport defect 3                                                             |
| Mm.39371                            | potassium voltage-gated channel, subfamily Q, member 5                                          |
| Mm.392                              | indoleamine-pyrrole 2,3 dioxygenase                                                             |
| Mm.3879                             | hypoxia inducible factor 1, alpha subunit                                                       |
| Mm.38674                            | synaptotagmin-like 4                                                                            |
| Mm.38241                            | interleukin-1 receptor-associated kinase 1                                                      |
| Mm.37213                            | protein tyrosine phosphatase, receptor type, B                                                  |
| Mm.3705                             | procollagen-proline, 2-oxoglutarate 4-dioxygenase (proline 4-hydroxylase), alpha II polypeptide |
| Mm.355714                           | melanoma antigen, family D, 1                                                                   |
| Mm.34871                            | inhibitor of DNA binding 2                                                                      |
| Mm.347639                           | F-box and leucine-rich repeat protein 10                                                        |
| Mm.347564                           | zinc finger, DHHC domain containing 14                                                          |
| Mm.347308                           | Metal response element binding transcription factor 2                                           |
| Mm.332474                           | G-rich RNA sequence binding factor 1                                                            |
| Mm.331392                           | mitogen-activated protein kinase kinase 1 interacting protein 1                                 |
| Mm.331051                           | guanine monophosphate synthetase                                                                |
| Mm.330501                           | mitogen activated protein kinase binding protein 1                                              |
| Mm.328945                           | A kinase (PRKA) anchor protein 8                                                                |
| Mm.32842                            | natural killer tumor recognition sequence                                                       |
| Mm.32835                            | solute carrier family 25 (mitochondrial oxodicarboxylate carrier), member 21                    |
| Mm.32801                            | Stam binding protein                                                                            |
| Mm.322018                           | activating transcription factor 7 interacting protein                                           |
| Mm.3118                             | ARP1 actin-related protein 1 homolog A (yeast)                                                  |
| Mm.305047                           | dipeptidylpeptidase 6                                                                           |
| Mm.30217                            | calcium and integrin binding 1 (calmyrin)                                                       |
| Mm.30199                            | casein kinase 1, epsilon                                                                        |
| Mm.300594                           | surfeit gene 4                                                                                  |
| Mm.30010                            | actin related protein 2/3 complex, subunit 1B                                                   |
| Mm.29966                            | polypyrimidine tract binding protein 2                                                          |
| Mm.29924                            | ADP-ribosylation factor-like 6 interacting protein 1                                            |
| Mm.297883                           | chloride channel 4-2                                                                            |
| Mm.297192                           | ADP-ribosylation factor guanine nucleotide-exchange factor 2 (brefeldin A-inhibited)            |
| Mm.296985                           | chaperonin subunit 4 (delta)                                                                    |
| Mm.296457                           | pellino 2                                                                                       |

**Additional data file 1 (continued)**

| UniGene ID                   | Gene description                                                                                  |
|------------------------------|---------------------------------------------------------------------------------------------------|
| Ubiquitous genes (continued) |                                                                                                   |
| Mm.296409                    | phosphatidylinositol-4-phosphate 5-kinase, type 1 beta                                            |
| Mm.296022                    | membrane metallo endopeptidase                                                                    |
| Mm.29495                     | CUG triplet repeat, RNA binding protein 1                                                         |
| Mm.294753                    | LPS-induced TN factor                                                                             |
| Mm.29389                     | keratin complex 2, basic, gene 8                                                                  |
| Mm.290421                    | early growth response 2                                                                           |
| Mm.290126                    | fucosidase, alpha-L- 1, tissue                                                                    |
| Mm.289936                    | phosphoserine aminotransferase 1                                                                  |
| Mm.289739                    | slit homolog 2 (Drosophila)                                                                       |
| Mm.247956                    | sushi domain containing 2                                                                         |
| Mm.289082                    | WD repeat domain 26                                                                               |
| Mm.28853                     | pituitary tumor-transforming 1 interacting protein                                                |
| Mm.28768                     | prostaglandin E synthase                                                                          |
| Mm.2863                      | integral membrane protein 1                                                                       |
| Mm.28614                     | ring finger protein 149                                                                           |
| Mm.28520                     | Sloan-Kettering viral oncogene homolog                                                            |
| Mm.282242                    | scavenger receptor class B, member 1                                                              |
| Mm.282096                    | elongation of very long chain fatty acids (FEN1/Elo2, SUR4/Elo3, yeast)-like 1                    |
| Mm.28162                     | nucleoporin 210                                                                                   |
| Mm.280199                    | sphingosine-1-phosphate phosphatase 1                                                             |
| Mm.280125                    | v-crk sarcoma virus CT10 oncogene homolog (avian)                                                 |
| Mm.277480                    | mortality factor 4 like 1                                                                         |
| Mm.275728                    | general transcription factor II A, 1                                                              |
| Mm.27567                     | TBC1 domain family, member 17                                                                     |
| Mm.27560                     | ubiquitin-like 1 (sentrin) activating enzyme E1B                                                  |
| Mm.274956                    | six transmembrane epithelial antigen of prostate 2                                                |
| Mm.274346                    | protein tyrosine kinase 9-like (A6-related protein)                                               |
| Mm.274093                    | arachidonate lipoxygenase, epidermal                                                              |
| Mm.271578                    | zinc and ring finger 1                                                                            |
| Mm.270511                    | transcription elongation regulator 1 (CA150)                                                      |
| Mm.270283                    | ribosomal protein S27                                                                             |
| Mm.26870                     | PHD finger protein 6                                                                              |
| Mm.262859                    | ring finger protein 38                                                                            |
| Mm.261333                    | signal-induced proliferation-associated 1 like 1                                                  |
| Mm.259751                    | chloride channel 3                                                                                |
| Mm.258927                    | eukaryotic translation elongation factor 1 delta (guanine nucleotide exchange protein)            |
| Mm.256809                    | zinc finger protein 148                                                                           |
| Mm.252210                    | serine (or cysteine) proteinase inhibitor, clade B, member 6a                                     |
| Mm.250256                    | ectonucleotide pyrophosphatase/phosphodiesterase 2                                                |
| Mm.2475                      | glutaryl-Coenzyme A dehydrogenase                                                                 |
| Mm.246803                    | SWI/SNF related, matrix associated, actin dependent regulator of chromatin, subfamily a, member 5 |
| Mm.244912                    | 3'-phosphoadenosine 5'-phosphosulfate synthase 1                                                  |
| Mm.24452                     | enoyl Coenzyme A hydratase, short chain, 1, mitochondrial                                         |
| Mm.244003                    | sciellin                                                                                          |
| Mm.242646                    | ubiquitin specific protease 9, X chromosome                                                       |
| Mm.239498                    | potassium channel tetramerisation domain containing 11                                            |
| Mm.235081                    | BH3 interacting domain death agonist                                                              |
| Mm.234641                    | RAR-related orphan receptor beta                                                                  |
| Mm.233117                    | pyrroline-5-carboxylate synthetase (glutamate gamma-semialdehyde synthetase)                      |
| Mm.22708                     | serine (or cysteine) proteinase inhibitor, clade H, member 1                                      |
| Mm.222825                    | thioredoxin domain containing 7                                                                   |
| Mm.219685                    | phosphatidylinositol glycan, class F                                                              |
| Mm.21874                     | proteasome (prosome, macropain) subunit, beta type 3                                              |
| Mm.215110                    | ARP8 actin-related protein 8 homolog (S. cerevisiae)                                              |
| Mm.213025                    | actin, alpha 2, smooth muscle, aorta                                                              |
| Mm.213016                    | G protein-coupled receptor 64                                                                     |
| Mm.21109                     | gelsolin                                                                                          |
| Mm.2103                      | cyclin G1                                                                                         |
| Mm.210018                    | pleckstrin homology domain containing, family C (with FERM domain) member 1                       |

| UniGene ID                   | Gene description                                                                                                             |
|------------------------------|------------------------------------------------------------------------------------------------------------------------------|
| Ubiquitous genes (continued) |                                                                                                                              |
| Mm.209175                    | myeloid/lymphoid or mixed lineage-leukemia translocation to 10 homolog (Drosophila)                                          |
| Mm.207619                    | IQ motif containing GTPase activating protein 1                                                                              |
| Mm.206642                    | mannoside acetylglucosaminyltransferase 2                                                                                    |
| Mm.205266                    | acetyl-Coenzyme A acyltransferase 1                                                                                          |
| Mm.20216                     | galactokinase 2                                                                                                              |
| Mm.20047                     | ADP-ribosylarginine hydrolase                                                                                                |
| Mm.196634                    | ATP-binding cassette, sub-family C (CFTR/MRP), member 1                                                                      |
| Mm.193539                    | histone 1, H1c                                                                                                               |
| Mm.191749                    | phosphodiesterase 4A, cAMP specific                                                                                          |
| Mm.18603                     | histidine decarboxylase                                                                                                      |
| Mm.181278                    | vacuolar protein sorting 24 (yeast)                                                                                          |
| Mm.178524                    | ubiquitin specific protease 32                                                                                               |
| Mm.173286                    | transportin 1                                                                                                                |
| Mm.160386                    | ABO blood group (transferase A, alpha 1-3-N-acetylgalactosaminyltransferase, transferase B, alpha 1-3-galactosyltransferase) |
| Mm.153684                    | SERTA domain containing 1                                                                                                    |
| Mm.144978                    | non-catalytic region of tyrosine kinase adaptor protein 2                                                                    |
| Mm.142822                    | Ewing sarcoma homolog                                                                                                        |
| Mm.138832                    | H3 histone, family 3A                                                                                                        |
| Mm.13787                     | ceruloplasmin                                                                                                                |
| Mm.124728                    | aarF domain containing kinase 4                                                                                              |
| Mm.12459                     | ankyrin repeat domain 10                                                                                                     |
| Mm.121265                    | proteasome (prosome, macropain) subunit, alpha type 1                                                                        |
| Mm.1161                      | zinc finger protein 185                                                                                                      |
| Mm.1114                      | galactosidase, alpha                                                                                                         |
| Mm.10724                     | ets homologous factor                                                                                                        |
| Mm.105309                    | PDZ domain containing 6                                                                                                      |
| Mm.10229                     | FUS interacting protein (serine-arginine rich) 1                                                                             |
