# Supplementary material for: Systematic identification and integrative analysis of novel genes expressed specifically or predominantly in mouse epididymis
Source: Springer Nature journal article supplement (doi:10.1186/1471-2164-7-314), 2006-12-01
Supplement: Additional file 2 [file 1471-2164-7-314-s2.pdf]

**Additional data file 2**  
**List of unknown genes**

| UniGene ID                          | Gene description                                                                                            |
|-------------------------------------|-------------------------------------------------------------------------------------------------------------|
| <b>Epididymis-specific genes</b>    |                                                                                                             |
| Mm.99495                            | RIKEN 9230112N15 gene                                                                                       |
| Mm.99123                            | RIKEN cDNA 9230102M18 gene                                                                                  |
| Mm.117440                           | Transcribed sequences                                                                                       |
| Mm.235619                           | RIKEN cDNA 9230113P08 gene                                                                                  |
| Mm.190482                           | RIKEN cDNA 9230107M04 gene                                                                                  |
| Mm.99740                            | Transcribed sequence                                                                                        |
| Mm.99576                            | RIKEN cDNA 9230106D23 gene                                                                                  |
| Mm.99385                            | Transcribed sequences                                                                                       |
| Mm.99350                            | clone:9230104O11 product:hypothetical protein                                                               |
| Mm.335701                           | Transcribed sequences                                                                                       |
| Mm.335028                           | Gene model 1111                                                                                             |
| Mm.297745                           | Gene model 846                                                                                              |
| Mm.190489                           | Transcribed sequences                                                                                       |
| Mm.159846                           | RIKEN cDNA 9230110F15 gene                                                                                  |
| Mm.99796                            | clone:9230118C10 product:unclassifiable                                                                     |
| Mm.99783                            | clone:9230117H04 product:unclassifiable                                                                     |
| Mm.99741                            | clone:9230116F02 product:unclassifiable                                                                     |
| Mm.99690                            | clone:9230111O07 product:unclassifiable                                                                     |
| Mm.99687                            | clone:9230111N06 product:unclassifiable                                                                     |
| Mm.99681                            | clone:9230111L08 product:unclassifiable                                                                     |
| Mm.99673                            | clone:9230111E06 product:unclassifiable                                                                     |
| Mm.99596                            | RIKEN cDNA 9230106L01 gene                                                                                  |
| Mm.99482                            | Transcribed sequences                                                                                       |
| Mm.99387                            | Transcribed sequences                                                                                       |
| Mm.99065                            | RIKEN cDNA 9230002F21 gene                                                                                  |
| Mm.342795                           | clone:9230109L20 product:unclassifiable                                                                     |
| Mm.342752                           | clone:9230101M15 product:unclassifiable                                                                     |
| Mm.339894                           | clone:9230116M18 product:hypothetical protein                                                               |
| Mm.335058                           | clone:9230101G17 product:unclassifiable                                                                     |
| Mm.331852                           | clone:9230110N05 product:unclassifiable                                                                     |
| Mm.325846                           | clone:9230117L06 product:unclassifiable                                                                     |
| Mm.324389                           | clone:9230119N23 product:unclassifiable                                                                     |
| Mm.324096                           | clone:9230119M08 product:hypothetical protein                                                               |
| Mm.322630                           | clone:9230113A21 product:hypothetical protein                                                               |
| Mm.321613                           | clone:9230116G16 product:unclassifiable                                                                     |
| Mm.320112                           | clone:9230112B19 product:unclassifiable                                                                     |
| Mm.319913                           | Transcribed sequence with weak similarity to protein sp:P54107 Cysteine-rich secretory protein-1 precursor  |
| Mm.319090                           | clone:9230111H06 product:unclassifiable                                                                     |
| Mm.317093                           | clone:9230107K11 product:unknown EST                                                                        |
| Mm.316775                           | clone:9230101D07 product:unclassifiable                                                                     |
| Mm.316040                           | clone:9230106G15 product:unclassifiable                                                                     |
| Mm.312513                           | clone:9230105G02 product:unclassifiable                                                                     |
| Mm.310386                           | clone:9230002O15 product:unclassifiable                                                                     |
| Mm.291102                           | Gene model 767                                                                                              |
| Mm.261512                           | RIKEN cDNA 9230108I15 gene                                                                                  |
| Mm.252429                           | Transcribed sequences                                                                                       |
| Mm.246757                           | RIKEN cDNA 9230106D20 gene                                                                                  |
| Mm.246591                           | hypothetical protein 9230109N16                                                                             |
| Mm.234248                           | Transcribed sequence                                                                                        |
| Mm.229362                           | clone:9230117D22 product:hypothetical protein                                                               |
| Mm.213029                           | clone:9230111G17 product:unclassifiable                                                                     |
| Mm.184185                           | clone:9230116O15 product:unclassifiable                                                                     |
| Mm.182366                           | clone:9230118O19 product:unclassifiable                                                                     |
| Mm.117487                           | clone:9230112D20 product:unclassifiable                                                                     |
| Mm.117483                           | RIKEN cDNA 9230112D13 gene                                                                                  |
| Mm.117476                           | clone:9230109C12 product:hypothetical protein                                                               |
| Mm.117464                           | RIKEN cDNA 9230105E05 gene                                                                                  |
| Mm.117455                           | clone:9230104K02 product:unclassifiable                                                                     |
| <b>Epididymis-predominant genes</b> |                                                                                                             |
| Mm.190454                           | RIKEN cDNA 9230107O10 gene                                                                                  |
| Mm.297297                           | LOC219026, clone:9230103K23 product:similar to Epididymal secretory protein 3 precursor [Rattus norvegicus] |
| Mm.245908                           | RIKEN cDNA 2700070H01 gene                                                                                  |

| UniGene ID                                      | Gene description                                                                                        |
|-------------------------------------------------|---------------------------------------------------------------------------------------------------------|
| <b>Epididymis-predominant genes (continued)</b> |                                                                                                         |
| Mm.99782                                        | RIKEN cDNA 9230117E20 gene                                                                              |
| Mm.99530                                        | RIKEN cDNA 9230102D03 gene                                                                              |
| Mm.99733                                        | RIKEN cDNA 9230116B18 gene                                                                              |
| Mm.99517                                        | RIKEN cDNA D930038D03 gene                                                                              |
| Mm.76718                                        | cDNA sequence AJ554213                                                                                  |
| Mm.293365                                       | Gene model 122, (NCBI)                                                                                  |
| Mm.159975                                       | RIKEN cDNA 9230104L09 gene                                                                              |
| Mm.117490                                       | clone:9230112O09 product:unknown EST                                                                    |
| Mm.99811                                        | RIKEN cDNA 9230118O15 gene                                                                              |
| Mm.99798                                        | clone:9230118D16 product:unknown EST                                                                    |
| Mm.99499                                        | RIKEN cDNA 9230101D24 gene                                                                              |
| Mm.82875                                        | RIKEN cDNA 2410125J01 gene                                                                              |
| Mm.44986                                        | RIKEN cDNA 9230102K24 gene                                                                              |
| Mm.332572                                       | Gene model 1679, (NCBI)                                                                                 |
| Mm.261496                                       | RIKEN cDNA 9230106F14 gene                                                                              |
| Mm.260883                                       | RIKEN cDNA 9230105K17 gene                                                                              |
| Mm.252404                                       | hypothetical protein C630025C03                                                                         |
| Mm.221512                                       | clone:9230109H06 product:unknown EST                                                                    |
| Mm.215346                                       | clone:9230112I12 product:unknown EST                                                                    |
| Mm.200622                                       | RIKEN cDNA 1700122C07 gene                                                                              |
| Mm.117489                                       | clone:9230112E12 product:unknown EST                                                                    |
| Mm.99400                                        | Gene model 749, (NCBI)                                                                                  |
| <b>Ubiquitous genes</b>                         |                                                                                                         |
| Mm.312675                                       | hypothetical protein A230091H23                                                                         |
| Mm.99613                                        | RIKEN cDNA C630041L24 gene                                                                              |
| Mm.330764                                       | RIKEN cDNA 9230106L14 gene                                                                              |
| Mm.282122                                       | DNA segment, Chr 7, Wayne State University 128                                                          |
| Mm.86373                                        | RIKEN cDNA 2010323F13 gene                                                                              |
| Mm.6890                                         | RIKEN cDNA 2010107K23 gene                                                                              |
| Mm.350950                                       | Transcribed sequences                                                                                   |
| Mm.347997                                       | RIKEN cDNA 4833408A19 gene                                                                              |
| Mm.330045                                       | RIKEN cDNA 1190006A08 gene                                                                              |
| Mm.31626                                        | RIKEN cDNA 4432416J03 gene                                                                              |
| Mm.29181                                        | RIKEN cDNA 2500002K03 gene                                                                              |
| Mm.248843                                       | RIKEN cDNA 3110040D16 gene                                                                              |
| Mm.213114                                       | RIKEN cDNA 9130423L19 gene                                                                              |
| Mm.99850                                        | RIKEN cDNA E130014J05 gene                                                                              |
| Mm.99790                                        | cDNA sequence BC062109                                                                                  |
| Mm.99727                                        | clone:9230116A06 product:unknown EST                                                                    |
| Mm.99648                                        | RIKEN cDNA A430065P19 gene                                                                              |
| Mm.99632                                        | clone:9230108H24 product:unknown EST                                                                    |
| Mm.99036                                        | LOC381220                                                                                               |
| Mm.9870                                         | RIKEN cDNA 2610528M18 gene                                                                              |
| Mm.89828                                        | RIKEN cDNA 5830472M02 gene                                                                              |
| Mm.87329                                        | RIKEN cDNA 5930437A14 gene                                                                              |
| Mm.83634                                        | RIKEN cDNA 6820443O06 gene                                                                              |
| Mm.70872                                        | clone:9230108E01 product:unknown EST                                                                    |
| Mm.67073                                        | RIKEN cDNA A230035L05 gene                                                                              |
| Mm.6055                                         | expressed sequence C81234                                                                               |
| Mm.59812                                        | RIKEN cDNA 1200009B18 gene                                                                              |
| Mm.46766                                        | RIKEN cDNA 2610528E23 gene                                                                              |
| Mm.44213                                        | RIKEN cDNA 1810073E21 gene                                                                              |
| Mm.38877                                        | RIKEN cDNA 9630015D15 gene                                                                              |
| Mm.355161                                       | RIKEN cDNA A530054J02 gene                                                                              |
| Mm.353627                                       | RIKEN cDNA 3222401L13 gene                                                                              |
| Mm.353072                                       | RIKEN cDNA 7530420F21 gene                                                                              |
| Mm.347773                                       | Transcribed sequences                                                                                   |
| Mm.347586                                       | CDNA sequence BC057079                                                                                  |
| Mm.345095                                       | RIKEN cDNA 9230112E08 gene                                                                              |
| Mm.34359                                        | RIKEN cDNA 2310068J10 gene                                                                              |
| Mm.342856                                       | Transcribed sequence with moderate similarity to protein ref:NP_286085.1 (E. coli) beta-D-galactosidase |
| Mm.342375                                       | clone:9230110P17 product:unknown EST                                                                    |
| Mm.341955                                       | Gene model 1878, (NCBI)                                                                                 |
| Mm.335338                                       | RIKEN cDNA 4922501C03 gene                                                                              |

**Additional data file 2 (continued)**

| UniGene ID                   | Gene description                                                                                                  |
|------------------------------|-------------------------------------------------------------------------------------------------------------------|
| Ubiquitous genes (continued) |                                                                                                                   |
| Mm.335582                    | Transcribed sequence with moderate similarity to protein ref:NP_057006.1 (H.sapiens) NAD                          |
| Mm.330809                    | RIKEN cDNA 9230111E07 gene                                                                                        |
| Mm.327678                    | Transcribed sequences                                                                                             |
| Mm.32656                     | RIKEN cDNA 2510006C20 gene                                                                                        |
| Mm.32615                     | RIKEN cDNA 2010200O16 gene                                                                                        |
| Mm.32566                     | RIKEN cDNA D730046L02 gene                                                                                        |
| Mm.321371                    | RIKEN cDNA C130037N17 gene                                                                                        |
| Mm.320183                    | Transcribed sequence with strong similarity to protein sp:P17008 (H.sapiens) RS16_HUMAN 40S ribosomal protein S16 |
| Mm.314835                    | clone:9230111O20 product:unclassifiableRIKEN cDNA                                                                 |
| Mm.31236                     | 2810441K11 gene                                                                                                   |
| Mm.31198                     | Expressed sequence AI585793                                                                                       |
| Mm.311752                    | Transcribed sequences                                                                                             |
| Mm.311575                    | RIKEN cDNA 9230116L04 gene                                                                                        |
| Mm.31129                     | cDNA sequence BC055447                                                                                            |
| Mm.306805                    | RIKEN cDNA 3100004P22 gene                                                                                        |
| Mm.304207                    | Similar to deleted in malignant brain tumors 1 isoform c precursor                                                |
| Mm.303528                    | hypothetical protein 9230110J10                                                                                   |
| Mm.301939                    | RIKEN cDNA 4732416N19 gene                                                                                        |
| Mm.301655                    | RIKEN cDNA 3110004O18 gene                                                                                        |
| Mm.297443                    | RIKEN cDNA 9230115A19 gene                                                                                        |
| Mm.294770                    | RIKEN cDNA 1500011L16 gene                                                                                        |
| Mm.292888                    | clone:9930114B14 product:unknown ESTRIKEN cDNA                                                                    |
| Mm.291979                    | 9530068E07 gene                                                                                                   |
| Mm.28626                     | RIKEN cDNA 2410018G23 gene                                                                                        |
| Mm.28597                     | DNA segment, Chr 15, ERATO Doi 747                                                                                |
| Mm.285452                    | Expressed sequence AI663975                                                                                       |
| Mm.28437                     | RIKEN cDNA 2700038L12 gene                                                                                        |
| Mm.283914                    | RIKEN cDNA 4833412N02 gene                                                                                        |
| Mm.28205                     | RIKEN cDNA 2310035C23 gene                                                                                        |
| Mm.281887                    | RIKEN cDNA 2610020H15 gene                                                                                        |
| Mm.279158                    | RIKEN cDNA 2610319K07 gene                                                                                        |
| Mm.275754                    | Transcribed sequences                                                                                             |
| Mm.274729                    | RIKEN cDNA 9230110G02 gene                                                                                        |
| Mm.272616                    | RIKEN cDNA 2010321M09 gene                                                                                        |
| Mm.271988                    | RIKEN cDNA 4930403J22 gene                                                                                        |
| Mm.268922                    | RIKEN cDNA E030041M21 gene                                                                                        |
| Mm.264680                    | RIKEN cDNA 1810049K24 gene                                                                                        |
| Mm.26150                     | RIKEN cDNA 9230115E21 gene                                                                                        |
| Mm.260557                    | cDNA sequence BC057552                                                                                            |
| Mm.259276                    | RIKEN cDNA 9230114K14 gene                                                                                        |
| Mm.259010                    | RIKEN cDNA 9230105E10 gene                                                                                        |
| Mm.255784                    | RIKEN cDNA 2810413I22 gene                                                                                        |
| Mm.255350                    | RIKEN cDNA 1700041C02 gene                                                                                        |
| Mm.252421                    | RIKEN cDNA 4921521J11 gene                                                                                        |
| Mm.250438                    | RIKEN cDNA 2310046G15 gene                                                                                        |
| Mm.247533                    | RIKEN cDNA A430105I19 gene                                                                                        |
| Mm.247113                    | RIKEN cDNA A230103N10 gene                                                                                        |
| Mm.24576                     | RIKEN cDNA B230106I24 gene                                                                                        |
| Mm.24356                     | RIKEN cDNA 9130427A09 gene                                                                                        |
| Mm.23671                     | RIKEN cDNA 1500031H04 gene                                                                                        |
| Mm.23242                     | RIKEN cDNA 4933428A15 gene                                                                                        |
| Mm.227929                    | RIKEN cDNA 9230110F11 gene                                                                                        |
| Mm.22782                     | clone:9230001K01 product:unknown EST                                                                              |
| Mm.22242                     | Expressed sequence AW112037                                                                                       |
| Mm.219183                    | RIKEN cDNA C130032F08 gene                                                                                        |
| Mm.219149                    | RIKEN cDNA 2810013C04 gene                                                                                        |
| Mm.215745                    | RIKEN cDNA 9230110M18 gene                                                                                        |
| Mm.215255                    | RIKEN cDNA D730039F16 gene                                                                                        |
| Mm.21187                     | RIKEN cDNA 1110005F07 gene                                                                                        |
| Mm.211654                    | hypothetical protein MGC6357                                                                                      |
| Mm.200231                    | expressed sequence AW049829                                                                                       |
| Mm.191894                    | Hypothetical protein 6430570G24                                                                                   |
| Mm.188105                    | RIKEN cDNA 2300006M17 gene                                                                                        |

| UniGene ID                   | Gene description                              |
|------------------------------|-----------------------------------------------|
| Ubiquitous genes (continued) |                                               |
| Mm.182359                    | RIKEN cDNA 9230117N10 gene                    |
| Mm.182293                    | RIKEN cDNA 4933415I03 gene                    |
| Mm.167879                    | RIKEN cDNA C030014K22 gene                    |
| Mm.166568                    | RIKEN cDNA C030018K18 gene                    |
| Mm.159903                    | RIKEN cDNA 9430085M18 gene                    |
| Mm.158488                    | RIKEN cDNA 4921522E24 gene                    |
| Mm.156724                    | clone:D230046H12 product:hypothetical protein |
| Mm.132391                    | hypothetical protein C230090D14               |
| Mm.130736                    | clone:9230113D18 product:unknown EST          |
| Mm.12255                     | RIKEN cDNA 2310042P20 gene                    |
| Mm.117475                    | RIKEN cDNA 9230109A22 gene                    |
| Mm.103545                    | cDNA sequence BC028789                        |
| Mm.103538                    | clone:9230114K02 product:unclassifiable       |
| Mm.103146                    | clone:9230115J04 product:unknown EST          |
| Mm.288805                    | expressed sequence AV216087                   |
| Mm.37332                     | DNA segment, Chr 16, ERATO Doi 472, expressed |
| Mm.289667                    | DNA segment, Chr 1, ERATO Doi 448, expressed  |
